# Supplementary material for: Molecular features underlying differential SHP1/SHP2 binding of immune checkpoint receptors
Source: eLife. 2021 Nov 4;10:e74276. doi: 10.7554/eLife.74276 (PMC8631942; doi:10.7554/eLife.74276)
Supplement: Figure 1—source data 2. [file elife-74276-fig1-data2.xlsx]

## Sheet: Sheet1
Figure 1A
	IP: PD-1
Stimulation (min)	SHP1 OD	SHP2 OD
0	0.139192	0.860326
1	0.193435	1.6735
2	0.195678	7.70397
5	0.191849	9.7436
10	0.205849	10.4056
20	0.203849	9.56414
Figure 1B
	IP: BTLA
Stimulation (min)	SHP1 OD	SHP2 OD
0	2.4369	2.09066
1	4.09509	2.53537
2	8.93389	3.88634
5	9.53131	3.82266
10	9.64597	2.93442
20	3.03488	2.22659
Figure 1C
	Relative IL-2 level (%, normalized to highest value in each replicate)
	WT Jurkat (PD-1-mGFP)			SHP2 KO Jurkat (PD-1-mGFP)			SHP1/SHP2 DKO Jurkat (PD-1-mGFP)			SHP1 KO Jurkat (PD-1-mGFP)			SHP1/SHP2 DKO Jurkat (Parental)
Pembrolizumab (nM)	Repeat 1	Repeat 2	Repeat 3	Repeat 1	Repeat 2	Repeat 3	Repeat 1	Repeat 2	Repeat 3	Repeat 1	Repeat 2	Repeat 3	Repeat 1	Repeat 2	Repeat 3
0	28.668	36.5963	32.2833	63.6009	60.9432	60.9551	73.9035	63.7019	63.7477	17.4112	24.6502	32.8544	98.0641	97.7236	89.1284
0.4	26.9551	35.4851	31.9097	59.4781	58.5757	62.2226	67.2958	59.7866	56.6624	16.3939	31.9705	30.285	95.3726	95.0224	91.7572
1.3	28.1045	39.4123	32.9044	63.4554	63.622	63.8967	71.9384	67.9503	59.7437	15.6545	24.08	30.0739	100	99.2921	100
4.4	35.0088	54.8192	41.7462	75.0892	78.9738	82.2678	80.5657	79.0244	72.4914	18.977	26.6822	36.0956	96.3105	98.1446	98.6269
13.3	64.43	82.8551	67.9121	91.0516	90.4217	97.3684	100	100	92.2209	41.8982	69.6562	58.8859	92.1857	100	96.802
44	86.617	93.7489	94.6541	93.1885	97.049	97.0247	93.1409	97.4362	93.3824	64.9467	85.9322	81.648	90.9285	95.9374	95.1899
133	94.8027	100	96.1605	88.9445	92.4465	100	96.4762	93.783	94.0784	80.6028	93.225	86.7884	88.3718	97.9035	98.0621
267	100	99.5589	100	100	100	98.4807	95.0919	91.861	100	100	100	100	92.8486	95.5345	99.27
