# Supplementary material for: Molecular features underlying differential SHP1/SHP2 binding of immune checkpoint receptors
Source: eLife. 2021 Nov 4;10:e74276. doi: 10.7554/eLife.74276 (PMC8631942; doi:10.7554/eLife.74276)
Supplement: Figure 2—source data 2. [file elife-74276-fig2-data2.xlsx]

## Sheet: Sheet1
Figure 2A
	SHP2 OD/PD-1 FI
Repeat	PD-1WT	PD-1FY	PD-1YF	PD-1FF
1	0.960927	0.395783	0.0855219	0.0903258
2	1.17752	0.473749	0.0140724	0.00957053
3	0.991801	0.291601	0.0294258	0.0323372
Figure 2B
anti-SHP2 FI / GFP FI
PD-1WT	PD-1YF	PD-1FY	PD-1FF
0.306479	0.447297	0.717247	0.321409
0.831819	0.486188	0.475297	0.226129
1.58414	0.256032	0.35334	0.215207
0.743551	0.819647	0.513274	0.675466
0.427753	0.345876	0.709295	0.596232
0.840884	0.340044	0.883584	0.48217
0.770759	0.372441	0.582133	0.268091
0.313224	0.251761	0.324953	0.248856
0.546083	0.506903	0.557823	0.656169
0.44092	0.507109	0.517276	0.240293
0.30134	0.553082	0.662793	0.298207
0.98491	0.222476	0.584988	0.21141
1.04622	0.260831	0.374713	0.392852
0.457435	0.492428	0.581208	0.236114
0.416676	0.312922	0.649974	0.371793
0.461701	0.415777	0.401831	0.390857
0.935364	0.311314	0.718513	0.370036
0.524939	0.539233	0.361132	0.273208
0.644329	0.441876	0.629014	0.213269
0.30548	0.443923	0.238832	0.348023
0.592148	0.66553	0.716719	0.32423
0.495407	0.623036	0.782458	0.309894
0.384533	0.31691	0.596379	0.251334
0.604924	0.365485	0.371895	0.530619
0.753135	0.516623	0.658592	0.274358
0.838764	0.43308	0.568101	0.187822
0.510815	0.48963	0.549305	0.402096
1.01184	0.32517	0.538983	0.272726
0.687197	0.337578	0.294415	0.815436
0.594206	0.579536	0.325675	0.234831
0.428778	0.528111	0.377191	0.344128
0.789723	0.260348	0.19932	0.265555
0.497604	0.451181	0.566151	0.37986
1.08935	0.439898	0.496378	0.377869
0.776738	0.270861	1.26803	0.489213
0.748947	0.494322	0.656742	0.602067
0.631346	0.436068	0.459789	0.286396
0.547459	0.642915	0.698574	0.409012
0.687494	0.337432	0.565016	0.307213
1.12472	0.377082	0.505349	0.262425
