# Supplementary material for: Molecular features underlying differential SHP1/SHP2 binding of immune checkpoint receptors
Source: eLife. 2021 Nov 4;10:e74276. doi: 10.7554/eLife.74276 (PMC8631942; doi:10.7554/eLife.74276)
Supplement: Figure 3—source data 2. [file elife-74276-fig3-data2.xlsx]

## Sheet: Figure 3
Figure 3A
	Binding curves (Response units (RU) against [sSH2])
[sSH2] (M)	pITIM:SHP1-nSH2	pITIM:SHP1-cSH2	pITIM:SHP2-nSH2	pITIM:SHP2-cSH2	pITSM:SHP1-nSH2	pITSM:SHP1-cSH2	pITSM:SHP2-nSH2	pITSM:SHP2-cSH2
2e-08	14.9	n.d.	101	13.4	141	65.1	198	250
5e-08	76.1	n.d.	170	17.9	319	129	384	542
1e-07	133	n.d.	319	21.5	518	191	750	699
2e-07	227	n.d.	440	59.3	684	336	1010	885
5e-07	358	n.d.	583	110	817	664	1290	1100
1e-06	335	n.d.	865	191	803	1062	1320	1240
	Kd values
Repeat	pITIM:SHP1-nSH2	pITIM:SHP1-cSH2	pITIM:SHP2-nSH2	pITIM:SHP2-cSH2	pITSM:SHP1-nSH2	pITSM:SHP1-cSH2	pITSM:SHP2-nSH2	pITSM:SHP2-cSH2
1	0.2	n.d.	0.27	1.9	0.083	1.1	0.12	0.083
2	0.21	n.d.	0.42	0.77	0.072	0.66	0.11	0.077
3	0.4	n.d.	0.46	1.4	0.11	3.2	0.2	0.13
average	0.27	n.d.	0.383333	1.35667	0.0883333	1.65333	0.143333	0.0966667

## Sheet: Figure 3—figure supplement 1
Figure 3—figure supplement 1C
	Fluorescent intensities of PD-1 molecules
Bin Center	PD-1 WT	PD-1 YF	PD-1 FY
10	0	0	0
15	6	1	2
20	7	6	3
25	10	7	3
30	15	9	12
35	34	32	14
40	29	51	33
45	32	46	34
50	12	28	32
55	4	7	23
60	3	6	8
65	0	1	7
70	2	0	1
75	0	1	2
80	0	0	2
85	0	0	0
Figure 3—figure supplement 1F
Colocalization rate of PD-1 and SHP1 or SHP2
SHP1			SHP2
PD-1 WT	PD-1 YF	PD-1 FY	PD-1 WT	PD-1 YF	PD-1 FY
8.23529	0	0.970874	34.2342	10.1307	8.86076
11.7647	0	2.15054	28.9308	16.1725	10.6952
12.5	0	2.52101	26.4706	15.7761	15.1111
7.69231	0	1.94175	25.3807		13.4259
10.4167	0	1.92308	29.0816		13.41
