# Supplementary material for: Molecular features underlying differential SHP1/SHP2 binding of immune checkpoint receptors
Source: eLife. 2021 Nov 4;10:e74276. doi: 10.7554/eLife.74276 (PMC8631942; doi:10.7554/eLife.74276)
Supplement: Figure 4—source data 2. [file elife-74276-fig4-data2.xlsx]

## Sheet: Sheet1
Figure 4B
mCherry FI / mGFP FI
SHP1WT	SHP1SHP2-nSH2	SHP1SHP2-cSH2	SHP1SHP2-tSH2
0.303678	0.705126	0.676478	1.32145
0.234107	0.230189	0.584003	0.465016
0.11209	0.52565	1.45472	1.56714
0.0970156	0.381933	0.665936	1.57146
0.604141	0.20539	0.545113	0.371215
0.232803	0.776218	0.839383	0.885379
0.448516	0.556199	1.12089	1.60864
0.463405	1.10339	0.423671	1.46695
0.473269	0.784442	0.495297	0.65886
0.206619	1.03737	1.20653	2.30385
0.2808	0.197375	1.80366	1.5045
0.312704	0.282199	0.645265	1.26279
0.306894	0.358478	0.541083	0.484374
0.195213	0.396313	1.16718	0.967871
0.133512	0.298231	0.525524	1.53825
0.223813	0.548521	0.595589	2.65121
0.455956	0.572031	0.529474	1.92838
0.215669	0.349001	0.984825	2.41764
0.220485	0.291966	0.395726	1.63145
0.26047	0.379419	0.656782	1.13397
0.955272	0.324964	0.933758	1.53808
0.249161	0.41297	0.619015	1.99578
0.297626	0.395747	1.76014	1.48974
0.626554	1.25454	1.14302	1.36982
0.186185	1.05402	0.974402	1.19681
0.308839	0.472979	1.40974	0.564056
0.295856	0.309572	2.02027	2.39757
0.236812	0.368227	0.639342	1.45012
0.300625	0.481348	0.795957	0.4373
0.389449	0.308285	1.29891	0.850666
0.259054	0.410739	0.716253	1.86738
0.222239	0.50424	0.62675	1.30892
0.130736	0.330157	0.984369	0.28166
0.215109	0.356158	0.979914	1.76324
0.208746	0.36437	1.6327	1.65913
0.260394	0.48569	0.858569	1.65751
0.285762	0.419431	1.53309	0.659461
0.380336	0.490932	0.645964	1.21852
0.159345	0.348867	2.14617	0.8138
0.30051	0.212857	1.65138	1.97164
0.330058	0.214889	0.530625	1.03093
0.246467	1.3057	0.42197	1.75038
0.250789	0.408634	1.0438	1.71376
0.272624	0.788806	1.06107	0.972754
0.195595	0.558335	1.0188	1.13903
0.320096	1.2874	0.83672	2.54647
0.334899	0.732027	1.14072	2.09704
0.346041	0.650983	1.06529	1.31898
0.13737	0.390425	0.296232	1.12027
Figure 4C
	SHP1 OD/PD-1 FI
Repeat	SHP1WT	SHP1SHP2-nSH2	SHP1SHP2-cSH2	SHP1SHP2-tSH2
1	0.0102474	0.127893	1.10756	1.82661
2	0.0217615	0.0288456	0.556039	2.70699
3	0.00401819	0.0722875	0.681332	2.10077
