# Supplementary material for: Molecular features underlying differential SHP1/SHP2 binding of immune checkpoint receptors
Source: eLife. 2021 Nov 4;10:e74276. doi: 10.7554/eLife.74276 (PMC8631942; doi:10.7554/eLife.74276)
Supplement: Figure 5—source data 2. [file elife-74276-fig5-data2.xlsx]

## Sheet: Figure 5
Figure 5B
	SHP1 OD/BTLA FI
Repeat	BTLAWT	BTLAFYYY	BTLAYFYY	BTLAYYFY	BTLAYYYF	BTLAFFFF
1	1.19765	1.06745	1.34594	0.00183398	0.00228801	0.00643054
2	1.30522	0.704658	0.638203	0.0120608	0.00202053	0.00237172
3	1.01037	0.557436	0.591466	0.00192222	0.00896217	0.00789948
	SHP2 OD/BTLA FI
Repeat	BTLAWT	BTLAFYYY	BTLAYFYY	BTLAYYFY	BTLAYYYF	BTLAFFFF
1	1.00995	0.679831	1.33581	0.119479	0.179058	0.280265
2	1.258	0.973469	0.954467	0.0162227	0.0132191	0.0209048
3	0.820983	0.406576	0.437181	0.00828883	0.00849462	0.00671526

## Sheet: Figure 5—figure supplement 1
Figure 5—figure supplement 1
	SHP1 OD/BTLA FI
Repeat	BTLAWT	BTLAFFYY	BTLAFFFF
1	0.977377	0.783607	0.0288112
2	1.19063	0.903043	0.0138245
3	0.941108	0.586558	0.0283732
	SHP2 OD/BTLA FI
Repeat	BTLAWT	BTLAFFYY	BTLAFFFF
1	1.02512	1.08486	0.0269443
2	0.901467	1.21207	0.0330086
3	1.25947	0.678728	0.0229199
