# Supplementary material for: Molecular features underlying differential SHP1/SHP2 binding of immune checkpoint receptors
Source: eLife. 2021 Nov 4;10:e74276. doi: 10.7554/eLife.74276 (PMC8631942; doi:10.7554/eLife.74276)
Supplement: Figure 6—source data 1. [file elife-74276-fig6-data1.xlsx]

## Sheet: Sheet1
Figure 6A
	Binding curves (Response units (RU) against [sSH2])
[sSH2] (M)	pITIM:SHP1-nSH2	pITIM:SHP1-cSH2	pITIM:SHP2-nSH2	pITIM:SHP2-cSH2	pITSM:SHP1-nSH2	pITSM:SHP1-cSH2	pITSM:SHP2-nSH2	pITSM:SHP2-cSH2
2e-08	164	38.7	54.5	18.9	n.d.	38.6	45.5	-1
5e-08	335	43.2	177	33.9	n.d.	53.6	95.7	46.6
1e-07	538	99.1	319	75.6	n.d.	155	109	58.9
2e-07	623	156	381	144	n.d.	185	135	140
5e-07	694	399	620	289	n.d.	435	293	182
1e-06	633	631	803	365	n.d.	552	566	343
	Kd values
Repeat	pITIM:SHP1-nSH2	pITIM:SHP1-cSH2	pITIM:SHP2-nSH2	pITIM:SHP2-cSH2	pITSM:SHP1-nSH2	pITSM:SHP1-cSH2	pITSM:SHP2-nSH2	pITSM:SHP2-cSH2
1	0.05	1.8	0.27	0.62	n.d.	0.61	2.7	1.1
2	0.068	1.6	0.32	1.1	n.d.	0.76	0.84	0.84
3	0.073	2	0.43	1.7	n.d.	1.2	2.8	1.2
average	0.0636667	1.8	0.34	1.14	n.d.	0.856667	2.11333	1.04667
