# Supplementary material for: Molecular features underlying differential SHP1/SHP2 binding of immune checkpoint receptors
Source: eLife. 2021 Nov 4;10:e74276. doi: 10.7554/eLife.74276 (PMC8631942; doi:10.7554/eLife.74276)
Supplement: Figure 7—source data 2. [file elife-74276-fig7-data2.xlsx]

## Sheet: Figure 7B
Figure 7B
	SHP1 OD/PD-1 FI
	WT Jurkat		SHP2 KO Jurkat
Repeat	PD-1WT	PD-1BTLA-ITIM	PD-1WT	PD-1BTLA-ITIM
1	0.00893252	0.208887	0.0189212	0.963097
2	0.0164358	0.237441	0.0107514	0.909467
3	0.0140286	0.255819	0.0203049	0.955527
Figure7C
anti-SHP1 FI / mGFP FI
PD-1WT	PD-1BTLA-ITIM
0.234637	1.14475
0.1691	1.23903
0.679697	1.77981
0.619208	1.13274
0.436166	2.14384
0.86248	2.26953
0.430092	0.824261
0.559898	0.944655
0.403027	0.819416
0.588284	1.26844
0.327909	0.937909
0.498272	1.69669
0.392238	1.42084
0.210157	1.44303
0.298416	2.47621
0.328786	1.8685
0.351527	0.753122
0.231695	0.846691
0.515226	1.75475
0.282359	1.40963
0.217325	1.52554
0.353565	2.26163
0.368565	1.28184
0.351859	1.29289
0.265833	0.966052
0.177803	0.832711
0.297015	1.21342
0.347666	1.14075
0.325146	1.11144
0.403597	1.71599
0.310594	1.33559
0.635811	0.597446
0.473606	1.17944
0.389747	1.03129
0.26496	0.665073
0.431392	0.787757
0.205156	1.54029
0.256634	0.902246
0.306663	0.538293
0.132824	2.10949
0.373418	1.78614
0.15291	1.61338

## Sheet: Figure 7─figure supplement 2B
Figure 7─figure supplement 2B
	SHP1 OD/BTLA FI
	WT Jurkat		SHP2 KO Jurkat
Repeat	BTLAWT	BTLAPD-1-ITIM	BTLAWT	BTLAPD-1-ITIM
1	1.16069	0.0350917	1.21711	0.0870156
2	1.22416	0.0800913	1.24248	0.211104
3	1.1063	0.0270036	1.30564	0.18363
