# Supplementary material for: Molecular features underlying differential SHP1/SHP2 binding of immune checkpoint receptors
Source: eLife. 2021 Nov 4;10:e74276. doi: 10.7554/eLife.74276 (PMC8631942; doi:10.7554/eLife.74276)
Supplement: Figure 8—source data 2. [file elife-74276-fig8-data2.xlsx]

## Sheet: Sheet1
Figure 8B
	SHP1 OD/PD-1 FI
	PD-1 variants
Repeat	WT	BTLA-ITIM	V221I	D222V	G224A	E225S
1	0.0519411	0.885976	0.0123349	0.0584071	0.2645	0.00974613
2	0.045474	0.948221	0.0131665	0.0618096	0.269552	0.0102256
3	0.0250986	0.906883	0.0172916	0.0582847	0.207545	0.0150657
Figure 8C
anti-SHP1 FI / mGFP FI
PD-1 variants
WT	BTLA-ITIM	V221I	D222V	G224A	E225S
0.714826	3.80005	0.774941	0.844181	3.01348	0.474548
1.65878	2.23979	0.741009	0.591683	1.59884	1.26974
0.72637	1.82067	0.458977	0.620617	1.52943	1.7953
1.57025	2.64214	0.518564	0.95271	1.17529	1.23175
1.75385	2.54496	0.665636	2.03083	1.47588	0.885656
1.07267	1.76071	0.846835	0.80772	1.2744	0.458059
1.55428	1.78916	0.398115	0.742957	2.00285	0.780803
1.48682	2.76064	0.494578	0.694075	0.858491	1.06653
1.14162	1.3784	0.836949	0.884391	1.46967	1.09428
1.85857	2.04035	0.611101	1.04082	1.18675	1.25078
1.44939	3.71541	0.611684	0.293637	1.05262	0.557325
0.850393	1.79999	0.522467	1.01254	2.29919	0.48737
1.28747	2.20956	0.473681	0.585834	0.885132	0.732237
1.01314	2.28245	0.968889	0.692169	0.75683	0.893102
1.27767	1.80753	1.12973	0.660921	0.814605	0.54698
0.943412	2.5736	0.544166	0.639961	1.68132	0.822765
1.19509	2.04324	0.526697	1.34029	0.690947	0.45203
0.775705	1.5403	0.459885	0.673506	0.981784	1.21584
0.899359	2.67051	0.998541	1.32405	1.62552	0.737896
1.26967	1.70134	0.902823	0.588473	1.57661	0.917483
1.34267	1.54852	1.07923	0.694792	0.437954	1.19808
1.33586	1.23249	0.632435	0.410203	1.56773	0.59712
1.08865	1.61544	1.18193	0.61772	1.00137	0.603692
0.991925	1.70888	0.740224	0.37964	2.3141	1.18334
0.890795	1.94326	0.982744	0.473861	2.02709	0.785538
0.758219	1.5488	0.530879	0.913821	1.87213	1.10593
0.754309	1.74278	0.550022	0.606465	1.49404	1.64292
0.900428	2.69658	0.506546	0.769492	1.80357	1.14136
1.29311	2.02496	0.617294	0.5038	2.88916	0.85842
0.605546	1.70485	0.774482	0.342462	2.25633	0.865707
1.413	1.778	0.595302	0.441516	0.706332	0.497406
0.821548	2.18278	0.524247	0.556214	1.30245	0.740429
0.655441	2.0472	1.34351	0.411066	2.04973	0.408604
0.98338	1.83651	0.637173	0.862415	2.06637	0.929257
0.820901	4.86626	0.58842	0.491722	1.10682	0.864833
Figure 8E
	SHP1 OD/PD-1 FI
	PD-1 variants
Repeat	WT	BTLA-ITIM	BTLA-ITIM A224G	Siglec6-ITIM	Siglec9-ITIM	CD300LF-ITIM	VSTM4-ITIM	SIRPα-ITIM
1	0.0273272	1.55554	0.187932	1.71379	0.423901	0.607372	0.641504	0.593233
2	0.0422904	1.54158	0.104555	1.9557	0.528876	0.689881	0.573158	0.692266
3	0.0411418	1.73225	0.072567	2.09467	0.503389	0.7991	0.806853	0.719406
Figure 8F
SHP1 OD/PD-1 FI
PD-1 variants
WT	BTLA-ITIM	BTLA-ITIM A224G	Siglec6-ITIM	Siglec9-ITIM	CD300LF-ITIM	VSTM4-ITIM	SIRPα-ITIM
1.00527	2.08846	1.5647	1.32566	0.856702	1.43369	1.39956	0.771122
1.1084	1.93014	1.50986	1.33504	1.33791	2.21303	1.23715	3.01474
1.03705	1.23154	0.762896	3.06743	0.976836	2.8501	1.72587	2.17383
0.715236	1.36874	0.837018	1.24939	0.96134	1.54238	2.00981	2.68208
0.759735	1.01537	1.35869	1.47391	1.85679	2.96914	1.64962	1.56017
0.481506	1.77752	0.565386	2.02517	1.61575	1.95395	3.25408	3.3664
0.966068	1.04631	1.65124	1.34804	1.64478	1.45245	1.26748	1.50347
1.03059	2.80791	1.08152	2.04744	2.85838	1.53021	1.88451	1.75733
1.13543	1.91568	0.990412	3.89294	2.16022	1.85525	0.975112	1.78845
0.750458	1.18768	1.2354	2.66696	0.919922	1.09851	1.2905	0.833223
0.801423	0.995709	1.01049	0.766779	2.1641	2.38238	1.4544	1.05177
0.712568	2.77517	1.21692	1.96357	1.24755	1.39158	2.01424	2.92535
1.09148	1.71433	1.31694	2.14675	1.16153	2.12147	1.43932	1.40902
1.05942	0.882773	1.84546	2.91775	1.22082	1.33896	1.76489	2.27373
0.620772	1.20841	1.18653	1.15822	2.68	1.09443	1.85889	1.98446
0.749539	1.5305	0.932622	0.982567	2.37182	1.2835	2.00448	2.13619
0.751321	1.33998	1.12233	1.18065	0.929983	1.45153	0.865134	3.16579
0.429585	2.92288	1.11849	2.77631	3.47728	1.02655	0.93829	1.21873
0.976576	2.76573	1.23905	1.58825	1.24593	1.17324	1.47266	1.99276
0.614167	1.93102	1.04549	1.44094	2.72611	1.50274	1.29206	1.15633
0.51135	1.10388	0.998576	3.70972	0.820608	1.06509	0.873252	0.885893
0.581052	1.52299	1.87165	1.69416	0.926786	1.18279	1.23887	2.63498
0.739929	1.72039	0.818153	3.11746	2.28525	1.03567	1.11736	1.99789
0.392065	3.85701	1.34655	1.35553	1.59574	1.13621	3.85714	1.92685
1.32068	2.85325	0.980773	2.87353	0.907774	1.73698	0.783749	2.27635
1.42739	2.91582	0.9415	3.16485	2.3173	1.18966	1.61455	0.877205
1.93485	0.994168	0.943609	3.32451	2.95848	1.237	1.90045	3.12291
0.672453	1.5531	1.43293	1.71019	1.10278	1.16249	2.11193	0.831835
0.862732	3.91262	1.40441	1.87063	1.54626	2.21395	0.920429	1.61075
0.524336	1.81411	1.31562	4.15976	1.34029	1.90025	1.33825	1.46023
0.744996	1.26865	0.719977	2.27601	1.68353	2.71652	3.36539	1.73659
1.32092	3.69846	0.784767	2.05831	0.816322	1.51502	1.4708	1.2916
0.61174	1.91413	1.17043	1.7604	1.45661	1.79735	1.92379	1.04169
1.1884	1.52072	1.5653	1.60695	2.53643	1.1475	2.72436	1.79248
0.753349	1.09086	0.753772	2.54842	1.31896	1.30578	3.4361	1.81904
