# Supplementary material for: Molecular features underlying differential SHP1/SHP2 binding of immune checkpoint receptors
Source: eLife. 2021 Nov 4;10:e74276. doi: 10.7554/eLife.74276 (PMC8631942; doi:10.7554/eLife.74276)
Supplement: Figure 9—source data 1. [file elife-74276-fig9-data1.xlsx]

## Sheet: Sheet1
Figure 9C
anti-SHP1 FI / mGFP FI
PD-1 variants
BTLA-ITIM	WT	A	V	L	I	F	W	P	S	T	K	D
0.543623	0.342924	0.458694	0.55669	0.661265	0.726031	0.44917	0.421984	0.36411	0.341764	0.32627	0.413006	0.346604
0.544716	0.347088	0.483812	0.558448	0.661549	0.753444	0.474008	0.43948	0.369628	0.373607	0.338938	0.435255	0.371253
0.555583	0.348334	0.544747	0.563504	0.67102	0.778373	0.495923	0.447961	0.372957	0.40011	0.391183	0.445498	0.39573
0.557026	0.365605	0.552142	0.597477	0.678055	0.785568	0.508157	0.460911	0.390659	0.413567	0.418375	0.471304	0.405528
0.56159	0.368908	0.56184	0.613522	0.684911	0.811607	0.515113	0.467835	0.392016	0.429987	0.429757	0.486118	0.418653
0.670225	0.370979	0.574877	0.63411	0.687391	0.813293	0.517912	0.468956	0.397049	0.455697	0.433001	0.487014	0.429303
0.707609	0.375465	0.577802	0.688101	0.695666	0.827498	0.521951	0.477903	0.397915	0.471542	0.43759	0.490987	0.43526
0.723229	0.380354	0.583057	0.706563	0.703417	0.82918	0.525022	0.485375	0.410026	0.509876	0.446054	0.504431	0.455334
0.72458	0.390854	0.616031	0.738928	0.721035	0.830576	0.530926	0.493484	0.425862	0.518557	0.459357	0.504779	0.455828
0.73506	0.393682	0.66309	0.748539	0.725631	0.840135	0.53792	0.510904	0.434495	0.529749	0.467778	0.512745	0.4781
0.752864	0.398011	0.675175	0.760019	0.733708	0.850614	0.540721	0.517331	0.444521	0.530784	0.488334	0.5173	0.493346
0.77913	0.408184	0.706887	0.764222	0.737942	0.854042	0.549637	0.523979	0.44495	0.530823	0.497332	0.523357	0.520785
0.785942	0.411647	0.709139	0.78238	0.744691	0.866469	0.555816	0.534089	0.449908	0.541962	0.508827	0.524863	0.544029
0.801384	0.412357	0.712079	0.788633	0.748657	0.876457	0.564611	0.561015	0.484988	0.544044	0.509745	0.525909	0.545742
0.815377	0.415098	0.761987	0.816192	0.787805	0.892923	0.578309	0.579685	0.494263	0.570201	0.519806	0.547235	0.54706
0.851138	0.431509	0.768647	0.816388	0.78843	0.896316	0.586212	0.58771	0.49907	0.57732	0.534662	0.579377	0.560273
0.863819	0.440867	0.787748	0.817212	0.78874	0.901526	0.611878	0.590077	0.515676	0.604665	0.546848	0.591698	0.5726
0.867848	0.441881	0.807183	0.825424	0.795296	0.905777	0.614678	0.594111	0.518615	0.613465	0.547345	0.599075	0.602732
0.870107	0.456061	0.819532	0.8552	0.802604	0.907799	0.61684	0.608359	0.520942	0.629388	0.559068	0.609097	0.617429
0.893887	0.471387	0.826966	0.869291	0.821448	0.913419	0.620837	0.610092	0.521258	0.634981	0.579139	0.614115	0.660469
0.895015	0.495532	0.831034	0.876084	0.85764	0.919611	0.626289	0.611576	0.530691	0.638595	0.583676	0.616774	0.668834
0.91568	0.518567	0.849882	0.882685	0.865637	0.921503	0.637613	0.614559	0.531522	0.643836	0.617752	0.639637	0.67183
0.919095	0.521747	0.869592	0.883874	0.87727	0.928278	0.686691	0.632441	0.546919	0.646058	0.622143	0.650764	0.682823
0.924166	0.532966	0.87847	0.949332	0.907767	0.930102	0.698492	0.633379	0.556514	0.659443	0.638173	0.651218	0.690548
0.949489	0.533451	0.87958	0.968329	0.968482	0.948802	0.709123	0.655601	0.587567	0.662025	0.657084	0.653837	0.710935
0.965593	0.533871	0.884099	0.969308	0.970901	0.953546	0.736205	0.695374	0.616378	0.662562	0.701277	0.664196	0.715693
0.979351	0.536952	0.912102	0.973212	1.08164	0.956514	0.737405	0.700731	0.618399	0.665084	0.702052	0.677453	0.715989
1.00889	0.540901	0.925487	0.984083	1.12047	0.962935	0.740581	0.748228	0.670513	0.672271	0.71678	0.683806	0.745289
1.0153	0.543854	0.949348	1.10521	1.2951	0.972326	0.740947	0.759796	0.678708	0.684974	0.718408	0.702398	0.7508
1.12208	0.57694	0.957173	1.10563	1.35497	1.00085	0.756787	0.819095	0.714184	0.706355	0.722855	0.716189	0.765236
1.413	1.778	0.595302	0.441516	0.706332	0.497406
0.821548	2.18278	0.524247	0.556214	1.30245	0.740429
0.655441	2.0472	1.34351	0.411066	2.04973	0.408604
0.98338	1.83651	0.637173	0.862415	2.06637	0.929257
0.820901	4.86626	0.58842	0.491722	1.10682	0.864833
Figure 9E
	Relative IL-2 levels (%)
Repeat	Parental	PD-1 variants
		WT	A	V	L	I	F	W
1	81.4554	68.6496	52.4433	44.8277	47.6797	52.5886	72.6911	69.8256
2	77.957	58.9859	46.222	42.2931	45.5742	50.3287	63.6831	60.352
3	82.8109	61.5705	45.2117	42.6273	48.4229	50.3063	70.3083	67.8797
