# Supplementary material for: Molecular features underlying differential SHP1/SHP2 binding of immune checkpoint receptors
Source: eLife journal article supplement (doi:10.7554/elife.74276), 2021-11-04

Figure 2A

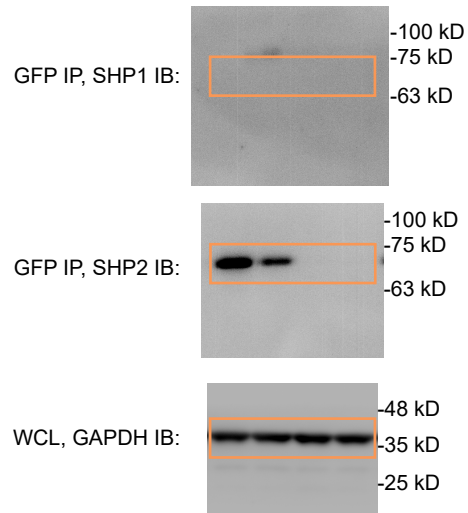

Supplement: supp [file elife-74276-supp-v1.zip]
