# Supplementary material for: Molecular features underlying differential SHP1/SHP2 binding of immune checkpoint receptors
Source: eLife journal article supplement (doi:10.7554/elife.74276), 2021-11-04
Supplement: supp [file elife_poa_e74276_Supplementary_file_1.docx]

**Supplementary Files for**

**Molecular Features Underlying Differential SHP1/SHP2 Binding of Immune Checkpoint Receptors**

Xiaozheng Xu1,3, Takeya Masubuchi1,3, Qixu Cai2, Yunlong Zhao1, & Enfu Hui1,4*

1Section of Cell & Developmental Biology, Division of Biological Sciences, University of California, San Diego, La Jolla, CA 92093-0347, USA
2Division of Life Science, State Key Laboratory of Molecular Neuroscience, Hong Kong University of Science and Technology, Clear Water Bay, Kowloon, Hong Kong, China

3These authors contribute equally
4Lead Contact
*Correspondence: [enfuhui@ucsd.edu](mailto:enfuhui@ucsd.edu)

**Supplementary File 1.** *K*d values of individual SH2 of SHP1/SHP2 and phosphorylated ITIM/ITSM of PD-1/BTLA; mean ± s.d. (n = 3).

| *K*d (M) | PD-1-pITIM | PD-1-pITSM | BTLA-pITIM | BTLA-pITSM |
| --- | --- | --- | --- | --- |
| SHP1-nSH2 | 0.27 ± 0.1 | 0.083 ± 0.020 | 0.064 ± 0.012 | n.d. |
| SHP1-cSH2 | n.d. | 1.7 ± 1.4 | 1.8 ± 0.20 | 0.86 ± 0.31 |
| SHP2-nSH2 | 0.38 ± 0.10 | 0.14 ± 0.049 | 0.34 ± 0.082 | 2.1 ± 1.1 |
| SHP2-cSH2 | 1.4 ± 0.57 | 0.10 ± 0.029 | 1.1 ± 0.54 | 1.1 ± 0.19 |

n.d.: not detected

**Supplementary File 2.** ∆G of PD-1/BTLA interactions with SHP1/SHP2-tSH2 in a parallel or an anti-parallel mode.

| ∆G (kJ/mol)a | Parallel | Anti-Parallel |
| --- | --- | --- |
| PD-1:SHP1-tSH2 | -70.4 | -40.4 |
| PD-1:SHP2-tSH2 | -76.6 | -72.5 |
| BTLA:SHP1-tSH2 | -75.7 | -32.8 |
| BTLA:SHP2-tSH2 | -70.9 | -66.4 |

a: ∆G = RT*ln (Kd), showing the change of Gibbs free energy;

T = 298.15 K, R is molar gas constant, R = 8.314 × 10-3 kJ/K/M

**Supplementary File 3.** ∆G of ITIM/ITSM and SH2 bindings.

| ∆G (kJ/mol)a | SHP1-nSH2 | SHP1-cSH2 | SHP2-nSH2 | SHP2-cSH2 |
| --- | --- | --- | --- | --- |
| PD-1-pITIM | -37.5 | 0.0 | -36.6 | -33.4 |
| PD-1-pITSM | -40.4 | -32.9 | -39.1 | -40.0 |
| BTLA-pITIM | -41.1 | -32.8 | -36.9 | -34.0 |
| BTLA-pITSM | 0.0 | -34.6 | -32.4 | -34.0 |

a: ∆G = RT*ln (Kd), showing the change of Gibbs free energy;

T = 298.15 K, R is molar gas constant, R = 8.314 × 10-3 kJ/K/M

**Supplementary File 4.** Immune receptors harboring both ITIM and ITSM

| Receptor | ITIM Y position  (AA) | ITSM Y position  (AA) | ITIM-ITSM distance (AA)a |
| --- | --- | --- | --- |
| PD-1 | 223 | 248 | 25 |
| BTLA | 257 | 282 | 25 |
| Siglec-3 | 340 | 358 | 18 |
| Siglec-5 | 520 | 544 | 24 |
| Siglec-6 | 426 | 446 | 20 |
| Siglec-9 | 433 | 456 | 23 |
| Siglec-11 | 644 | 668 | 24 |
| CD300LF | 249 | 284 | 35 |
| VSTM4 | 289 | 310 | 21 |
| SIRPα | 429  470  496 | 453 | 24  -16  -43 |
| SLAMF5 | 341 | 279  316 | -62  -25 |
| SLAMF6 | 274 | 285  309 | 11  35 |
| PECAM1 | 690 | 713 | 23 |
|  |  |  |  |
| MPIG6B | 211 | 237 | 26 |
| AA: amino acids  ITIM: immunoreceptor tyrosine-based inhibition motif  ITSM: immunoreceptor tyrosine-based switch motif  a: Calculated as (ITSM Y position) - (ITIM Y position) | | | |
